# Supplementary material for: Genetic Diversity and Population Genetic Structure Analysis of Plasmodium knowlesi Thrombospondin-Related Apical Merozoite Protein (TRAMP) in Clinical Samples
Source: MDPI journal article supplement (doi:10.3390/genes13111944), 2022-10-25

**Supplementary Table S1.** Study samples(accession numbers) and location/origin.

| <b>S.no</b> | <b>Sample I'd</b>       | <b>Location</b> |
|-------------|-------------------------|-----------------|
| 1           | XM_002262219            | P. Malaysia     |
| 2           | SRA (Philippine strain) | P. Malaysia     |
| 3           | P.MALAYSIA (MR4)        | P. Malaysia     |
| 4           | PKA1H1_140042800        | P. Malaysia     |
| 5           | PKNH_1437600            | P. Malaysia     |
| 6           | PKNOH_S140255700        | P. Malaysia     |
| 7           | KT267307                | P. Malaysia     |
| 8           | KT267308                | P. Malaysia     |
| 9           | KT267309                | P. Malaysia     |
| 10          | KT267310                | P. Malaysia     |
| 11          | KT267311                | P. Malaysia     |
| 12          | KT267312                | P. Malaysia     |
| 13          | KT267313                | P. Malaysia     |
| 14          | KT267314                | P. Malaysia     |
| 15          | KT267315                | P. Malaysia     |
| 16          | KT267316                | P. Malaysia     |
| 17          | KT267317                | P. Malaysia     |
| 18          | KT267318                | P. Malaysia     |
| 19          | KT267319                | P. Malaysia     |
| 20          | KT267320                | P. Malaysia     |
| 21          | KT267321                | P. Malaysia     |
| 22          | KT267322                | P. Malaysia     |
| 23          | KT267323                | P. Malaysia     |
| 24          | KT267324                | P. Malaysia     |
| 25          | KT267325                | P. Malaysia     |
| 26          | KT267326                | P. Malaysia     |
| 27          | KT267327                | P. Malaysia     |
| 28          | KT267328                | P. Malaysia     |
| 29          | KT267329                | P. Malaysia     |
| 30          | KT267330                | P. Malaysia     |
| 31          | KT267331                | P. Malaysia     |
| 32          | KT267332                | P. Malaysia     |
| 33          | KT267333                | P. Malaysia     |
| 34          | KT267334                | P. Malaysia     |
| 35          | KT267335                | P. Malaysia     |
| 36          | KT267336                | P. Malaysia     |
| 37          | KT267337                | P. Malaysia     |
| 38          | KT267338                | P. Malaysia     |
| 39          | KT267339                | P. Malaysia     |

|    |           |             |
|----|-----------|-------------|
| 40 | KT267340  | P. Malaysia |
| 41 | KT267341  | P. Malaysia |
| 42 | KT267342  | P. Malaysia |
| 43 | KT267343  | Sarikei     |
| 44 | KT267344  | Sarikei     |
| 45 | KT267345  | Sarikei     |
| 46 | KT267346  | Sarikei     |
| 47 | KT267347  | Sarikei     |
| 48 | KT267348  | Sabah       |
| 49 | KT267349  | Sabah       |
| 50 | KT267350  | Sabah       |
| 51 | KT267351  | Sabah       |
| 52 | KT267352  | Sabah       |
| 53 | KT267353  | Sabah       |
| 54 | KT267354  | Sabah       |
| 55 | KT267355  | Sabah       |
| 56 | KT267356  | Sabah       |
| 57 | KT267357  | Sabah       |
| 58 | KT267358  | Sabah       |
| 59 | KT267359  | Sabah       |
| 60 | KT267360  | Sabah       |
| 61 | ERR274221 | Sarikei     |
| 62 | ERR274222 | Sarikei     |
| 63 | ERR366425 | Sarikei     |
| 64 | ERR364226 | Sarikei     |
| 65 | ERR985374 | Betong      |
| 66 | ERR985376 | Betong      |
| 67 | ERR985377 | Betong      |
| 68 | ERR985378 | Betong      |
| 69 | ERR985379 | Betong      |
| 70 | ERR985380 | Betong      |
| 71 | ERR985381 | Betong      |
| 72 | ERR985382 | Betong      |
| 73 | ERR985383 | Betong      |
| 74 | ERR985384 | Betong      |
| 75 | ERR985410 | Betong      |
| 76 | ERR985411 | Betong      |
| 77 | ERR985385 | Kapit       |
| 78 | ERR985386 | Kapit       |
| 79 | ERR985387 | Kapit       |
| 80 | ERR985388 | Kapit       |
| 81 | ERR985389 | Kapit       |
| 82 | ERR985390 | Kapit       |

|    |           |       |
|----|-----------|-------|
| 83 | ERR985392 | Kapit |
| 84 | ERR985393 | Kapit |
| 85 | ERR985394 | Kapit |
| 86 | ERR985395 | Kapit |
| 87 | ERR985396 | Kapit |
| 88 | ERR985397 | Kapit |
| 89 | ERR985404 | Kapit |
| 90 | ERR985405 | Kapit |
| 91 | ERR985406 | Kapit |
| 92 | ERR985407 | Kapit |
| 93 | ERR985408 | Kapit |
| 94 | ERR985409 | Kapit |
| 95 | ERR985416 | Kapit |
| 96 | ERR985417 | Kapit |
| 97 | ERR985418 | Kapit |

---

Figure S1: Study samples (accession numbers) and location/origin.

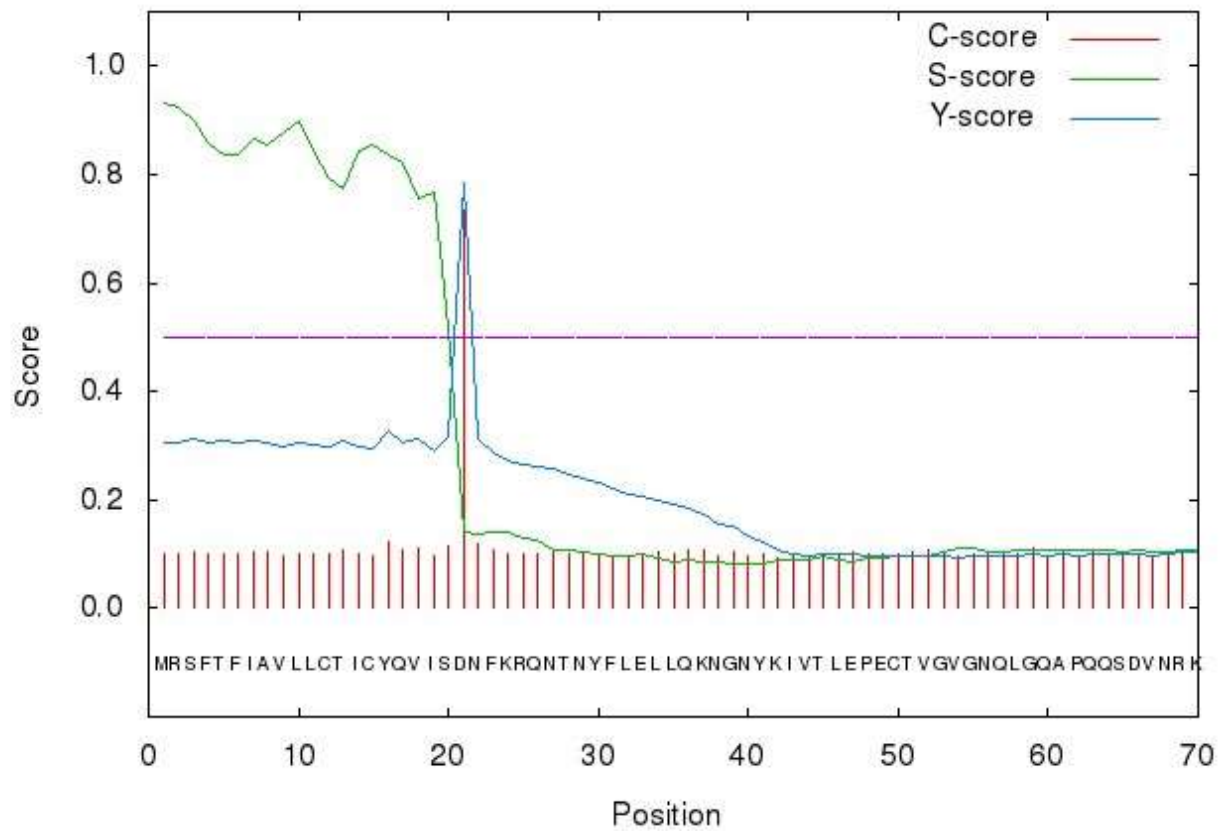

Supplement: s1 [file s1]
